# Supplementary material for: MC-QTAIM analysis reveals an exotic bond in coherently quantum superposed malonaldehyde
Source: Royal Society of Chemistry journal article supplement (doi:10.1039/d2cp05499j), 2023-01-01
Supplement: d2cp05499j1.pdf [file d2cp05499j1.pdf]

# Supporting Information

## **The MC-QTAIM analysis reveals an exotic bond in the coherently quantum superposed Malonaldehyde**

Mohammad Goli<sup>1</sup> and Shant Shahbazian<sup>2</sup>

<sup>1</sup>School of Nano Science, Institute for Research in Fundamental Sciences (IPM), Tehran 19395-  
5531, Iran,

Email: m\_goli@ipm.ir

<sup>2</sup>Department of Physics, Shahid Beheshti University, Evin, Tehran, Iran

E-mail: sh\_shahbazian@sbu.ac.ir

## **Table of contents**

**Page 3:** The optimized geometry of **1** (or **3**) and **2** at the CCSD(T)/cc-pVQZ level

**Page 4:** The averaged geometries of **4** and **5**

**Pages 5-6:** The regression procedure: Transforming numerical one-proton wavefunctions into Gaussian-type orbitals

**Page 7: Table S1-** Summary of the ab initio NEO-DFT results

| The optimized geometry of <b>1</b> (or <b>3</b> ) at the CCSD(T)/cc-pVQZ level |        |                    |           |          |
|--------------------------------------------------------------------------------|--------|--------------------|-----------|----------|
| Atom                                                                           | Number | Coordinates [Bohr] |           |          |
|                                                                                |        | X                  | Y         | Z        |
| C                                                                              | 1      | 0.000000           | 2.077361  | 0.000000 |
| C                                                                              | 2      | 2.339522           | 0.675322  | 0.000000 |
| C                                                                              | 3      | -2.236791          | 0.811101  | 0.000000 |
| O                                                                              | 4      | 2.439903           | -1.657362 | 0.000000 |
| O                                                                              | 5      | -2.441842          | -1.681011 | 0.000000 |
| H                                                                              | 6      | 0.019948           | 4.116154  | 0.000000 |
| H                                                                              | 7      | 4.109976           | 1.763188  | 0.000000 |
| H                                                                              | 8      | -4.041823          | 1.778489  | 0.000000 |
| H*                                                                             | 9      | -0.688985          | -2.333555 | 0.000000 |

\* The coordinates of the quantum hydrogen atom

| The optimized geometry of <b>2</b> at the CCSD(T)/cc-pVQZ level |        |                    |           |           |
|-----------------------------------------------------------------|--------|--------------------|-----------|-----------|
| Atom                                                            | Number | Coordinates [Bohr] |           |           |
|                                                                 |        | X                  | Y         | Z         |
| C                                                               | 1      | 0.000000           | 0.000000  | 2.130982  |
| C                                                               | 2      | 0.000000           | -2.239563 | 0.731188  |
| C                                                               | 3      | 0.000000           | 2.239563  | 0.731188  |
| O                                                               | 4      | 0.000000           | -2.229682 | -1.682393 |
| O                                                               | 5      | 0.000000           | 2.229682  | -1.682393 |
| H                                                               | 6      | 0.000000           | 0.000000  | 4.166644  |
| H                                                               | 7      | 0.000000           | -4.079697 | 1.658786  |
| H                                                               | 8      | 0.000000           | 4.079697  | 1.658786  |
| H*                                                              | 9      | 0.000000           | 0.000000  | -2.126078 |

\* The coordinates of the quantum hydrogen atom

| The averaged geometry of <b>4</b> |        |                    |          |          |
|-----------------------------------|--------|--------------------|----------|----------|
| Atom                              | Number | Coordinates [Bohr] |          |          |
|                                   |        | X                  | Y        | Z        |
| C                                 | 1      | 0.000000           | 0.000000 | 4.458367 |
| C                                 | 2      | 2.288822           | 0.000000 | 3.124956 |
| C                                 | 3      | -2.288822          | 0.000000 | 3.124956 |
| O                                 | 4      | 2.439951           | 0.000000 | 0.711995 |
| O                                 | 5      | -2.439951          | 0.000000 | 0.711995 |
| H                                 | 6      | 0.000000           | 0.000000 | 6.497257 |
| H                                 | 7      | 4.077565           | 0.000000 | 4.152645 |
| H                                 | 8      | -4.077565          | 0.000000 | 4.152645 |
| Bq <sup>*</sup>                   | 9      | -0.564373          | 0.000000 | 0.132820 |
| Bq <sup>*</sup>                   | 10     | 0.564373           | 0.000000 | 0.132820 |

\* The coordinates of the “ghost atoms” used as the centers of expansion for the electronic basis functions of the quantum hydrogen atom coinciding with the maxima of the ground state protonic orbital.

| The averaged geometry of <b>5</b> |        |                    |          |          |
|-----------------------------------|--------|--------------------|----------|----------|
| Atom                              | Number | Coordinates [Bohr] |          |          |
|                                   |        | X                  | Y        | Z        |
| C                                 | 1      | 0.000000           | 0.000000 | 4.458367 |
| C                                 | 2      | 2.288822           | 0.000000 | 3.124956 |
| C                                 | 3      | -2.288822          | 0.000000 | 3.124956 |
| O                                 | 4      | -2.439951          | 0.000000 | 0.711995 |
| O                                 | 5      | 2.439951           | 0.000000 | 0.711995 |
| H                                 | 6      | 0.000000           | 0.000000 | 6.497257 |
| H                                 | 7      | 4.077565           | 0.000000 | 4.152645 |
| H                                 | 8      | -4.077565          | 0.000000 | 4.152645 |
| Bq <sup>*</sup>                   | 9      | -0.582494          | 0.000000 | 0.121241 |
| Bq <sup>*</sup>                   | 10     | 0.582494           | 0.000000 | 0.121241 |

\* The coordinates of the “ghost atoms” used as the centers of expansion for the electronic basis functions of the quantum hydrogen atom coinciding with the maxima of the excited state protonic orbital.

## The regression procedure: Transforming the numerical protonic wavefunctions into the Gaussian-type orbitals

The numerical ground and excited protonic orbitals, obtained by the 3D Numerov method, were fitted by linear combinations of [6s6p6d] Cartesian Gaussian-type shells which were placed on the molecular symmetry plane of the averaged geometry that contains all the clamped nuclei. This is called the xz plane where the x-axis is the  $C_2$  geometrical symmetry axis with respect to the rotation of the clamped nuclei. In the fitting procedure, the protonic orbital is explicitly shown by:

$$\Psi_{ground\ state} = \sum_{i=1}^{15} [c_i \varphi_{\alpha_i}(x_i, y_i, z_i) + c_i \varphi_{\alpha_i}(-x_i, y_i, z_i)],$$

and,

$$\Psi_{excited\ state} = \sum_{i=1}^{15} [c_i \varphi_{\alpha_i}(x_i, y_i, z_i) - c_i \varphi_{\alpha_i}(-x_i, y_i, z_i)],$$

where  $c_i$ ,  $\alpha_i$  and  $(x_i, y_i, z_i)$  are the coefficients, exponents and coordinates of the center of  $i$ -th *normalized* Gaussian function in these series, respectively. It must be noted that only non-zero contributions, due to the molecular symmetry, were included in the wavefunction expansions and offered in the forthcoming tables of the optimal parameters. The following tables gather the optimized parameters of the protonic orbitals, which were derived after the fitting of the Gaussian expansions to the 3D grid of the protonic wavefunctions.

| Regression parameters of the ground state protonic orbital |              |               |          |             |                    |          |           |
|------------------------------------------------------------|--------------|---------------|----------|-------------|--------------------|----------|-----------|
| Function Number                                            | Shell Number | Function Type | Exponent | Coefficient | Coordinates [Bohr] |          |           |
|                                                            |              |               |          |             | X                  | Y        | Z         |
| 1                                                          | 1            | S             | 5.92536  | -0.667308   | 0.098133           | 0.000000 | -0.042515 |
| 2                                                          | 2            | S             | 4.90609  | 0.103662    | 0.831002           | 0.000000 | -0.082282 |
| 3                                                          | 3            | S             | 5.53872  | 0.971034    | 0.256124           | 0.000000 | -0.022740 |
| 4                                                          | 4            | Pz            | 9.99765  | -0.025588   | 0.894294           | 0.000000 | -0.102668 |
| 5                                                          | 5            | Pz            | 5.98643  | 0.277155    | 0.488342           | 0.000000 | -0.086228 |
| 6                                                          | 6            | Pz            | 8.71275  | -0.067002   | 0.668808           | 0.000000 | 0.221253  |
| 7                                                          | 7            | Dxx           | 6.17956  | 0.583140    | 0.559992           | 0.000000 | 0.043214  |
| 8                                                          | 7            | Dyy           | 6.17956  | -0.405039   | 0.559992           | 0.000000 | 0.043214  |
| 9                                                          | 7            | Dzz           | 6.17956  | 0.505316    | 0.559992           | 0.000000 | 0.043214  |
| 10                                                         | 8            | Dxx           | 6.97638  | 0.417660    | 0.736994           | 0.000000 | 0.148422  |
| 11                                                         | 8            | Dyy           | 6.97638  | -0.295682   | 0.736994           | 0.000000 | 0.148422  |
| 12                                                         | 8            | Dzz           | 6.97638  | 0.230332    | 0.736994           | 0.000000 | 0.148422  |
| 13                                                         | 9            | Dxx           | 6.33365  | -0.999577   | 0.649366           | 0.000000 | 0.093094  |
| 14                                                         | 9            | Dyy           | 6.33365  | 0.756131    | 0.649366           | 0.000000 | 0.093094  |
| 15                                                         | 9            | Dzz           | 6.33365  | -0.587118   | 0.649366           | 0.000000 | 0.093094  |

| Regression parameters of the excited state protonic orbital |              |               |          |             |                    |          |           |
|-------------------------------------------------------------|--------------|---------------|----------|-------------|--------------------|----------|-----------|
| Function Number                                             | Shell Number | Function Type | Exponent | Coefficient | Coordinates [Bohr] |          |           |
|                                                             |              |               |          |             | X                  | Y        | Z         |
| 1                                                           | 1            | S             | 7.94753  | -0.995443   | 0.063433           | 0.000000 | -0.199071 |
| 2                                                           | 2            | S             | 8.43716  | 0.469871    | 0.967696           | 0.000000 | 0.165908  |
| 3                                                           | 3            | S             | 6.71810  | 0.999654    | 0.280224           | 0.000000 | -0.116529 |
| 4                                                           | 4            | Pz            | 6.37756  | -0.778184   | 0.720576           | 0.000000 | 0.060806  |
| 5                                                           | 5            | Pz            | 7.81809  | 0.835965    | 0.545553           | 0.000000 | 0.019451  |
| 6                                                           | 6            | Pz            | 7.93854  | 0.155353    | 0.834297           | 0.000000 | 0.249593  |
| 7                                                           | 7            | Dxx           | 7.17292  | 0.272671    | 0.498309           | 0.000000 | 0.080944  |
| 8                                                           | 7            | Dyy           | 7.17292  | 0.310717    | 0.498309           | 0.000000 | 0.080944  |
| 9                                                           | 7            | Dzz           | 7.17292  | 0.434034    | 0.498309           | 0.000000 | 0.080944  |
| 10                                                          | 8            | Dxx           | 6.66305  | -0.207159   | 0.560419           | 0.000000 | 0.028372  |
| 11                                                          | 8            | Dyy           | 6.66305  | -0.999654   | 0.560419           | 0.000000 | 0.028372  |
| 12                                                          | 8            | Dzz           | 6.66305  | -0.402189   | 0.560419           | 0.000000 | 0.028372  |
| 13                                                          | 9            | Dxx           | 6.30875  | -0.468891   | 0.618625           | 0.000000 | 0.067678  |
| 14                                                          | 9            | Dyy           | 6.30875  | 0.861386    | 0.618625           | 0.000000 | 0.067678  |
| 15                                                          | 9            | Dzz           | 6.30875  | 0.019168    | 0.618625           | 0.000000 | 0.067678  |

**Table S1-** Summary of the ab initio NEO-DFT results.

| <b>Method/basis set<br/>System</b>                    | <b>B3LYP-EPC17-1/[cc-pVTZ:10s10p10d]</b> |                |
|-------------------------------------------------------|------------------------------------------|----------------|
|                                                       | <b>2</b>                                 | <b>1 and 3</b> |
| <i>Electronic kinetic energy</i>                      | 265.577772                               | 265.554369     |
| <i>Proton's kinetic energy</i>                        | 0.007718                                 | 0.007746       |
| <i>Electron-electron potential energy</i>             | 261.422933                               | 258.206955     |
| <i>Proton-electron potential energy</i>               | -13.233539                               | -12.654149     |
| <i>electron-clamped nuclei potential energy</i>       | -949.386639                              | -943.531760    |
| <i>Proton-clamped nuclei potential energy</i>         | 12.255060                                | 11.684860      |
| <i>Clamped Nuclei-clamped Nuclei potential energy</i> | 156.082444                               | 153.453666     |
| Total energy                                          | -267.274253                              | -267.278314    |
| Virial ratio                                          | 2.006359                                 | 2.006463       |
| <b>Method/basis set<br/>System</b>                    | <b>B3LYP/[cc-pVTZ:6s6p6d]</b>            |                |
|                                                       | <b>4</b>                                 | <b>5</b>       |
| <i>Electronic kinetic energy</i>                      | 265.443959                               | 265.454513     |
| <i>Proton's kinetic energy</i>                        | 0.005092                                 | 0.005817       |
| <i>Electron-electron potential energy</i>             | 258.213390                               | 258.215910     |
| <i>Proton-electron potential energy</i>               | -12.401579                               | -12.396164     |
| <i>electron-clamped nuclei potential energy</i>       | -943.513438                              | -943.531044    |
| <i>Proton-clamped nuclei potential energy</i>         | 11.709815                                | 11.712679      |
| <i>Clamped Nuclei-clamped Nuclei potential energy</i> | 153.388670                               | 153.388670     |
| Total energy                                          | -267.154092                              | -267.149620    |
| Virial ratio                                          | 2.006423                                 | 2.006364       |
